# Supplementary material for: Amido analogues of zincocenes and cadmocenes
Source: Royal Society of Chemistry journal article supplement (doi:10.1039/c0dt01710h), 2011-01-01
Supplement: c0dt01710h.pdf [file c0dt01710h.pdf]

*Dalton Trans.*

## Supplementary Information

### Amido Analogues of Zirconocenes and Cadmocenes

Alexander J. Blake, William Lewis, Jonathan McMaster, Rhiannon S. Moorhouse, Graeme J. Moxey and Deborah L. Kays\*

Supplementary Information

#### Refinement Details and Structural Data for **1** and **2**•C<sub>7</sub>H<sub>8</sub> and Details of Calculations on **1**, **1a** and **2**

Refinement Details and Structural data for **1**

Refinement Details and Structural data for **2**•C<sub>7</sub>H<sub>8</sub>

Details of Calculations

## Refinement Details and Structural data for 1

### Crystallographic Method

Crystals of **1** were mounted on a dual-stage glass fiber using YR-1800 perfluoropolyether oil (Lancaster) and cooled rapidly to 90 K in a stream of cold nitrogen using an Oxford Cryosystems low-temperature device. Data for compound **1** were collected on a Bruker SMART1000 diffractometer, equipped with a graphite-monochromated Mo- $K_{\alpha}$  radiation source ( $\lambda = 0.71073 \text{ \AA}$ ). Absorption corrections were applied using a multi-scan method (SADABS).<sup>1</sup> All non-H atoms were located using direct methods<sup>2</sup> and difference Fourier syntheses. All fully occupied non-H atoms were refined with anisotropic displacement parameters. CCDC 783804 contains the supplementary data for **1**. These data can be obtained free of charge from The Cambridge Crystallographic Data Centre *via* [www.ccdc.cam.ac.uk/data\\_request/cif](http://www.ccdc.cam.ac.uk/data_request/cif).

**Refinement special details:** We were unable to develop a split-atom disorder model for C52: the best description is a single atom with a prolate ellipsoid. We attribute the features which give rise to several validation Alerts to the existence of strong pseudosymmetry in the crystal structure. Although the space group indicated by analysis of systematic absences is  $P2_12_12$ , post-refinement analysis of the atomic positions indicates that 93% of these are compatible with  $Pccn$ , albeit within a wide agreement limit of 0.80 Angstroms.

Crystal data for **1**:  $C_{56}H_{80}N_2Zn$ ,  $M_r = 846.59$ ,  $0.31 \times 0.23 \times 0.15 \text{ mm}^3$ , orthorhombic, space group  $P2_12_12$  (No. 19),  $a = 24.0248(12)$ ,  $b = 35.8255(17)$ ,  $c = 11.7851(6)$ ,  $V = 10143.4(9) \text{ \AA}^3$ ,  $Z = 8$ ,  $\rho_{\text{calcd}} = 1.109 \text{ g cm}^{-3}$ ;  $\mu = 0.520 \text{ mm}^{-1}$ , Mo- $K_{\alpha}$  radiation,  $\lambda = 0.71073 \text{ \AA}$ ,  $T = 90 \text{ K}$ . 65071 reflections measured (23125 unique,  $R_{\text{int}} = 0.070$ ,  $\theta < 25^\circ$ ). Data were collected on a Bruker SMART1000 diffractometer and were corrected for absorption (transmission range 0.60-0.75). The structure was solved by direct methods and refined by full-matrix least-squares on  $F^2$  to give  $wR_2 = 0.114$  for all data and  $R_1 = 0.0448$  for 15771 reflections with  $I > 2\sigma(I)$ , GooF = 1.04 for 1065 parameters. Min. and max. residual electron densities – 0.69 and  $0.59 \text{ e/\AA}^3$ .

**Table S1.** Crystal data and structure refinement for **1**.

|                                   |                                                                                                      |
|-----------------------------------|------------------------------------------------------------------------------------------------------|
| Identification code               | ZNRMLC                                                                                               |
| Empirical formula                 | C <sub>56</sub> H <sub>80</sub> N <sub>2</sub> Zn                                                    |
| Formula weight                    | 846.59                                                                                               |
| Temperature                       | 90(2) K                                                                                              |
| Wavelength                        | 0.71073 Å                                                                                            |
| Crystal system                    | Orthorhombic                                                                                         |
| Space group                       | P 21 21 2                                                                                            |
| Unit cell dimensions              | a = 24.0248(12) Å      α = 90°.<br>b = 35.8255(17) Å      β = 90°.<br>c = 11.7851(6) Å      γ = 90°. |
| Volume                            | 10143.4(9) Å <sup>3</sup>                                                                            |
| Z                                 | 8                                                                                                    |
| Density (calculated)              | 1.109 Mg/m <sup>3</sup>                                                                              |
| Absorption coefficient            | 0.520 mm <sup>-1</sup>                                                                               |
| F(000)                            | 3680                                                                                                 |
| Crystal size                      | 0.31 x 0.23 x 0.15 mm <sup>3</sup>                                                                   |
| Theta range for data collection   | 1.02 to 27.48°.                                                                                      |
| Index ranges                      | -27<=h<=31, -46<=k<=30, -13<=l<=15                                                                   |
| Reflections collected             | 65071                                                                                                |
| Independent reflections           | 23125 [R(int) = 0.070]                                                                               |
| Completeness to theta = 25.03°    | 99.9 %                                                                                               |
| Absorption correction             | Semi-empirical from equivalents                                                                      |
| Max. and min. transmission        | 0.746 and 0.595                                                                                      |
| Refinement method                 | Full-matrix least-squares on F <sup>2</sup>                                                          |
| Data / restraints / parameters    | 17883 / 1100 / 1065                                                                                  |
| Goodness-of-fit on F <sup>2</sup> | 1.04                                                                                                 |
| Final R indices [I>2σ(I)]         | R1 = 0.0448, wR2 = 0.0947                                                                            |
| R indices (all data)              | R1 = 0.0782, wR2 = 0.114                                                                             |
| Absolute structure parameter      | 0.464(10)                                                                                            |
| Largest diff. peak and hole       | 0.59 and -0.69 e.Å <sup>-3</sup>                                                                     |

**Table S2.** Bond lengths [ $\text{\AA}$ ] and angles [ $^\circ$ ] for **1**.

---

|             |          |
|-------------|----------|
| Zn(1)-N(1)  | 1.867(3) |
| Zn(1)-N(2)  | 1.886(3) |
| N(1)-C(1)   | 1.427(4) |
| N(1)-C(12)  | 1.436(5) |
| C(1)-C(6)   | 1.405(5) |
| C(1)-C(2)   | 1.411(5) |
| Zn(2)-N(3)  | 1.870(3) |
| Zn(2)-N(4)  | 1.887(3) |
| N(2)-C(29)  | 1.430(4) |
| N(2)-C(40)  | 1.452(5) |
| C(2)-C(3)   | 1.407(5) |
| C(2)-C(13)  | 1.534(5) |
| N(3)-C(68)  | 1.431(4) |
| N(3)-C(57)  | 1.436(4) |
| C(3)-C(4)   | 1.399(5) |
| N(4)-C(85)  | 1.435(5) |
| N(4)-C(96)  | 1.435(4) |
| C(4)-C(5)   | 1.385(5) |
| C(4)-C(17)  | 1.544(5) |
| C(5)-C(6)   | 1.391(5) |
| C(6)-C(7)   | 1.437(5) |
| C(7)-C(8)   | 1.394(5) |
| C(7)-C(12)  | 1.413(5) |
| C(8)-C(9)   | 1.379(5) |
| C(9)-C(10)  | 1.401(5) |
| C(9)-C(21)  | 1.533(5) |
| C(10)-C(11) | 1.396(5) |
| C(11)-C(12) | 1.422(5) |
| C(11)-C(25) | 1.544(5) |
| C(13)-C(16) | 1.535(5) |
| C(13)-C(14) | 1.538(5) |
| C(13)-C(15) | 1.540(5) |
| C(17)-C(18) | 1.524(6) |
| C(17)-C(19) | 1.534(6) |
| C(17)-C(20) | 1.537(5) |
| C(21)-C(24) | 1.537(6) |
| C(21)-C(22) | 1.537(6) |
| C(21)-C(23) | 1.539(6) |

|             |          |
|-------------|----------|
| C(25)-C(27) | 1.528(5) |
| C(25)-C(28) | 1.539(5) |
| C(25)-C(26) | 1.553(5) |
| C(29)-C(30) | 1.409(5) |
| C(29)-C(34) | 1.412(5) |
| C(30)-C(31) | 1.395(5) |
| C(30)-C(41) | 1.539(5) |
| C(31)-C(32) | 1.402(5) |
| C(32)-C(33) | 1.377(5) |
| C(32)-C(45) | 1.548(5) |
| C(33)-C(34) | 1.389(5) |
| C(34)-C(35) | 1.450(5) |
| C(35)-C(36) | 1.378(5) |
| C(35)-C(40) | 1.412(5) |
| C(36)-C(37) | 1.389(5) |
| C(37)-C(38) | 1.408(5) |
| C(37)-C(49) | 1.536(5) |
| C(38)-C(39) | 1.387(5) |
| C(39)-C(40) | 1.407(5) |
| C(39)-C(53) | 1.542(5) |
| C(41)-C(44) | 1.534(5) |
| C(41)-C(42) | 1.540(5) |
| C(41)-C(43) | 1.542(5) |
| C(45)-C(46) | 1.503(6) |
| C(45)-C(47) | 1.516(6) |
| C(45)-C(48) | 1.523(6) |
| C(49)-C(52) | 1.527(6) |
| C(49)-C(50) | 1.532(5) |
| C(49)-C(51) | 1.542(5) |
| C(53)-C(55) | 1.519(5) |
| C(53)-C(54) | 1.529(5) |
| C(53)-C(56) | 1.542(5) |
| C(57)-C(58) | 1.412(5) |
| C(57)-C(62) | 1.416(5) |
| C(58)-C(59) | 1.387(5) |
| C(58)-C(69) | 1.561(5) |
| C(59)-C(60) | 1.408(5) |
| C(60)-C(61) | 1.390(5) |
| C(60)-C(73) | 1.530(5) |
| C(61)-C(62) | 1.386(5) |

|              |          |
|--------------|----------|
| C(62)-C(63)  | 1.450(5) |
| C(63)-C(64)  | 1.389(5) |
| C(63)-C(68)  | 1.400(5) |
| C(64)-C(65)  | 1.385(5) |
| C(65)-C(66)  | 1.400(5) |
| C(65)-C(77)  | 1.553(5) |
| C(66)-C(67)  | 1.404(5) |
| C(67)-C(68)  | 1.418(5) |
| C(67)-C(81)  | 1.533(5) |
| C(69)-C(70)  | 1.522(5) |
| C(69)-C(72)  | 1.536(5) |
| C(69)-C(71)  | 1.548(5) |
| C(73)-C(74)  | 1.530(6) |
| C(73)-C(76)  | 1.540(6) |
| C(73)-C(75)  | 1.541(6) |
| C(77)-C(80)  | 1.529(5) |
| C(77)-C(79)  | 1.531(5) |
| C(77)-C(78)  | 1.532(6) |
| C(81)-C(82)  | 1.533(5) |
| C(81)-C(83)  | 1.538(5) |
| C(81)-C(84)  | 1.539(5) |
| C(85)-C(86)  | 1.407(5) |
| C(85)-C(90)  | 1.408(5) |
| C(86)-C(87)  | 1.395(5) |
| C(86)-C(97)  | 1.548(5) |
| C(87)-C(88)  | 1.407(5) |
| C(88)-C(89)  | 1.389(5) |
| C(88)-C(101) | 1.527(5) |
| C(89)-C(90)  | 1.390(5) |
| C(90)-C(91)  | 1.439(5) |
| C(91)-C(92)  | 1.396(5) |
| C(91)-C(96)  | 1.407(5) |
| C(92)-C(93)  | 1.387(5) |
| C(93)-C(94)  | 1.406(5) |
| C(93)-C(105) | 1.537(5) |
| C(94)-C(95)  | 1.397(5) |
| C(95)-C(96)  | 1.411(5) |
| C(95)-C(109) | 1.537(5) |
| C(97)-C(100) | 1.527(5) |
| C(97)-C(99)  | 1.531(5) |

|               |          |
|---------------|----------|
| C(97)-C(98)   | 1.533(5) |
| C(101)-C(104) | 1.527(6) |
| C(101)-C(102) | 1.532(6) |
| C(101)-C(103) | 1.537(5) |
| C(105)-C(106) | 1.519(6) |
| C(105)-C(108) | 1.521(6) |
| C(105)-C(107) | 1.547(6) |
| C(109)-C(111) | 1.530(5) |
| C(109)-C(112) | 1.539(5) |
| C(109)-C(110) | 1.542(5) |

|                  |            |
|------------------|------------|
| N(1)-Zn(1)-N(2)  | 169.03(12) |
| C(1)-N(1)-C(12)  | 104.7(3)   |
| C(1)-N(1)-Zn(1)  | 116.8(2)   |
| C(12)-N(1)-Zn(1) | 108.0(2)   |
| C(6)-C(1)-C(2)   | 120.6(3)   |
| C(6)-C(1)-N(1)   | 110.6(3)   |
| C(2)-C(1)-N(1)   | 128.7(3)   |
| N(3)-Zn(2)-N(4)  | 169.50(13) |
| C(29)-N(2)-C(40) | 104.4(3)   |
| C(29)-N(2)-Zn(1) | 114.6(2)   |
| C(40)-N(2)-Zn(1) | 103.1(2)   |
| C(3)-C(2)-C(1)   | 115.2(3)   |
| C(3)-C(2)-C(13)  | 120.2(3)   |
| C(1)-C(2)-C(13)  | 124.6(3)   |
| C(68)-N(3)-C(57) | 104.7(3)   |
| C(68)-N(3)-Zn(2) | 116.9(2)   |
| C(57)-N(3)-Zn(2) | 107.0(2)   |
| C(4)-C(3)-C(2)   | 125.2(3)   |
| C(85)-N(4)-C(96) | 104.5(3)   |
| C(85)-N(4)-Zn(2) | 105.3(2)   |
| C(96)-N(4)-Zn(2) | 114.6(2)   |
| C(5)-C(4)-C(3)   | 117.4(3)   |
| C(5)-C(4)-C(17)  | 120.0(3)   |
| C(3)-C(4)-C(17)  | 122.6(3)   |
| C(4)-C(5)-C(6)   | 120.2(3)   |
| C(5)-C(6)-C(1)   | 121.3(3)   |
| C(5)-C(6)-C(7)   | 131.4(3)   |
| C(1)-C(6)-C(7)   | 107.3(3)   |
| C(8)-C(7)-C(12)  | 122.2(4)   |

|                   |          |
|-------------------|----------|
| C(8)-C(7)-C(6)    | 130.5(4) |
| C(12)-C(7)-C(6)   | 106.9(3) |
| C(9)-C(8)-C(7)    | 119.8(4) |
| C(8)-C(9)-C(10)   | 117.1(3) |
| C(8)-C(9)-C(21)   | 123.4(4) |
| C(10)-C(9)-C(21)  | 119.3(3) |
| C(11)-C(10)-C(9)  | 126.1(4) |
| C(10)-C(11)-C(12) | 115.3(3) |
| C(10)-C(11)-C(25) | 117.2(3) |
| C(12)-C(11)-C(25) | 127.2(3) |
| C(7)-C(12)-C(11)  | 119.3(3) |
| C(7)-C(12)-N(1)   | 110.3(3) |
| C(11)-C(12)-N(1)  | 130.1(3) |
| C(2)-C(13)-C(16)  | 112.7(3) |
| C(2)-C(13)-C(14)  | 110.2(3) |
| C(16)-C(13)-C(14) | 106.2(3) |
| C(2)-C(13)-C(15)  | 110.1(3) |
| C(16)-C(13)-C(15) | 106.9(3) |
| C(14)-C(13)-C(15) | 110.5(3) |
| C(18)-C(17)-C(19) | 108.8(4) |
| C(18)-C(17)-C(20) | 107.7(3) |
| C(19)-C(17)-C(20) | 109.1(3) |
| C(18)-C(17)-C(4)  | 112.8(3) |
| C(19)-C(17)-C(4)  | 109.4(3) |
| C(20)-C(17)-C(4)  | 109.0(3) |
| C(9)-C(21)-C(24)  | 108.5(3) |
| C(9)-C(21)-C(22)  | 111.8(3) |
| C(24)-C(21)-C(22) | 108.8(3) |
| C(9)-C(21)-C(23)  | 110.7(3) |
| C(24)-C(21)-C(23) | 109.1(4) |
| C(22)-C(21)-C(23) | 107.8(4) |
| C(27)-C(25)-C(28) | 107.2(3) |
| C(27)-C(25)-C(11) | 115.7(3) |
| C(28)-C(25)-C(11) | 110.0(3) |
| C(27)-C(25)-C(26) | 107.2(3) |
| C(28)-C(25)-C(26) | 109.2(3) |
| C(11)-C(25)-C(26) | 107.4(3) |
| C(30)-C(29)-C(34) | 119.8(3) |
| C(30)-C(29)-N(2)  | 129.6(3) |
| C(34)-C(29)-N(2)  | 110.6(3) |



|                   |          |
|-------------------|----------|
| C(31)-C(30)-C(29) | 115.9(3) |
| C(31)-C(30)-C(41) | 120.3(3) |
| C(29)-C(30)-C(41) | 123.7(3) |
| C(30)-C(31)-C(32) | 124.9(4) |
| C(33)-C(32)-C(31) | 118.0(3) |
| C(33)-C(32)-C(45) | 120.2(3) |
| C(31)-C(32)-C(45) | 121.7(3) |
| C(32)-C(33)-C(34) | 119.5(4) |
| C(33)-C(34)-C(29) | 121.9(3) |
| C(33)-C(34)-C(35) | 130.6(4) |
| C(29)-C(34)-C(35) | 107.4(3) |
| C(36)-C(35)-C(40) | 121.6(4) |
| C(36)-C(35)-C(34) | 131.7(4) |
| C(40)-C(35)-C(34) | 106.6(3) |
| C(35)-C(36)-C(37) | 119.6(4) |
| C(36)-C(37)-C(38) | 117.3(4) |
| C(36)-C(37)-C(49) | 119.6(4) |
| C(38)-C(37)-C(49) | 123.2(4) |
| C(39)-C(38)-C(37) | 125.4(4) |
| C(38)-C(39)-C(40) | 115.1(3) |
| C(38)-C(39)-C(53) | 120.8(3) |
| C(40)-C(39)-C(53) | 123.9(3) |
| C(39)-C(40)-C(35) | 120.4(3) |
| C(39)-C(40)-N(2)  | 129.0(3) |
| C(35)-C(40)-N(2)  | 110.4(3) |
| C(44)-C(41)-C(30) | 112.6(3) |
| C(44)-C(41)-C(42) | 107.2(3) |
| C(30)-C(41)-C(42) | 108.7(3) |
| C(44)-C(41)-C(43) | 106.5(3) |
| C(30)-C(41)-C(43) | 111.6(3) |
| C(42)-C(41)-C(43) | 110.2(3) |
| C(46)-C(45)-C(47) | 110.1(4) |
| C(46)-C(45)-C(48) | 108.4(4) |
| C(47)-C(45)-C(48) | 107.3(4) |
| C(46)-C(45)-C(32) | 110.5(3) |
| C(47)-C(45)-C(32) | 108.3(3) |
| C(48)-C(45)-C(32) | 112.2(3) |
| C(52)-C(49)-C(50) | 108.9(4) |
| C(52)-C(49)-C(37) | 109.0(3) |
| C(50)-C(49)-C(37) | 113.2(3) |

|                   |          |
|-------------------|----------|
| C(52)-C(49)-C(51) | 108.9(4) |
| C(50)-C(49)-C(51) | 108.3(3) |
| C(37)-C(49)-C(51) | 108.4(4) |
| C(55)-C(53)-C(54) | 107.9(3) |
| C(55)-C(53)-C(56) | 107.7(3) |
| C(54)-C(53)-C(56) | 109.0(3) |
| C(55)-C(53)-C(39) | 112.0(3) |
| C(54)-C(53)-C(39) | 109.5(3) |
| C(56)-C(53)-C(39) | 110.7(3) |
| C(58)-C(57)-C(62) | 119.4(3) |
| C(58)-C(57)-N(3)  | 130.1(3) |
| C(62)-C(57)-N(3)  | 110.3(3) |
| C(59)-C(58)-C(57) | 115.9(3) |
| C(59)-C(58)-C(69) | 116.7(3) |
| C(57)-C(58)-C(69) | 126.9(3) |
| C(58)-C(59)-C(60) | 125.8(3) |
| C(61)-C(60)-C(59) | 116.9(4) |
| C(61)-C(60)-C(73) | 123.4(3) |
| C(59)-C(60)-C(73) | 119.7(3) |
| C(62)-C(61)-C(60) | 119.7(4) |
| C(61)-C(62)-C(57) | 122.2(3) |
| C(61)-C(62)-C(63) | 131.0(3) |
| C(57)-C(62)-C(63) | 106.6(3) |
| C(64)-C(63)-C(68) | 122.3(3) |
| C(64)-C(63)-C(62) | 130.4(3) |
| C(68)-C(63)-C(62) | 107.3(3) |
| C(65)-C(64)-C(63) | 118.7(3) |
| C(64)-C(65)-C(66) | 118.8(3) |
| C(64)-C(65)-C(77) | 119.0(3) |
| C(66)-C(65)-C(77) | 122.1(3) |
| C(65)-C(66)-C(67) | 124.6(3) |
| C(66)-C(67)-C(68) | 115.0(3) |
| C(66)-C(67)-C(81) | 120.8(3) |
| C(68)-C(67)-C(81) | 124.2(3) |
| C(63)-C(68)-C(67) | 120.5(3) |
| C(63)-C(68)-N(3)  | 110.8(3) |
| C(67)-C(68)-N(3)  | 128.6(3) |
| C(70)-C(69)-C(72) | 107.6(3) |
| C(70)-C(69)-C(71) | 107.4(3) |
| C(72)-C(69)-C(71) | 110.0(3) |

|                    |          |
|--------------------|----------|
| C(70)-C(69)-C(58)  | 115.5(3) |
| C(72)-C(69)-C(58)  | 107.0(3) |
| C(71)-C(69)-C(58)  | 109.3(3) |
| C(60)-C(73)-C(74)  | 112.6(3) |
| C(60)-C(73)-C(76)  | 109.9(3) |
| C(74)-C(73)-C(76)  | 107.7(4) |
| C(60)-C(73)-C(75)  | 108.6(3) |
| C(74)-C(73)-C(75)  | 108.5(3) |
| C(76)-C(73)-C(75)  | 109.4(4) |
| C(80)-C(77)-C(79)  | 107.9(3) |
| C(80)-C(77)-C(78)  | 108.6(4) |
| C(79)-C(77)-C(78)  | 108.9(3) |
| C(80)-C(77)-C(65)  | 112.9(3) |
| C(79)-C(77)-C(65)  | 108.4(3) |
| C(78)-C(77)-C(65)  | 110.0(3) |
| C(67)-C(81)-C(82)  | 112.2(3) |
| C(67)-C(81)-C(83)  | 111.1(3) |
| C(82)-C(81)-C(83)  | 106.8(3) |
| C(67)-C(81)-C(84)  | 109.8(3) |
| C(82)-C(81)-C(84)  | 106.6(3) |
| C(83)-C(81)-C(84)  | 110.3(3) |
| C(86)-C(85)-C(90)  | 119.8(3) |
| C(86)-C(85)-N(4)   | 129.2(3) |
| C(90)-C(85)-N(4)   | 110.8(3) |
| C(87)-C(86)-C(85)  | 115.9(3) |
| C(87)-C(86)-C(97)  | 120.0(3) |
| C(85)-C(86)-C(97)  | 124.0(3) |
| C(86)-C(87)-C(88)  | 125.1(4) |
| C(89)-C(88)-C(87)  | 117.2(3) |
| C(89)-C(88)-C(101) | 119.8(3) |
| C(87)-C(88)-C(101) | 122.9(3) |
| C(88)-C(89)-C(90)  | 119.6(4) |
| C(89)-C(90)-C(85)  | 121.8(3) |
| C(89)-C(90)-C(91)  | 131.6(3) |
| C(85)-C(90)-C(91)  | 106.5(3) |
| C(92)-C(91)-C(96)  | 121.8(3) |
| C(92)-C(91)-C(90)  | 130.4(3) |
| C(96)-C(91)-C(90)  | 107.8(3) |
| C(93)-C(92)-C(91)  | 119.1(3) |
| C(92)-C(93)-C(94)  | 117.9(3) |

|                      |          |
|----------------------|----------|
| C(92)-C(93)-C(105)   | 121.4(3) |
| C(94)-C(93)-C(105)   | 120.8(3) |
| C(95)-C(94)-C(93)    | 125.4(3) |
| C(94)-C(95)-C(96)    | 115.0(3) |
| C(94)-C(95)-C(109)   | 119.9(3) |
| C(96)-C(95)-C(109)   | 125.0(3) |
| C(91)-C(96)-C(95)    | 120.7(3) |
| C(91)-C(96)-N(4)     | 110.1(3) |
| C(95)-C(96)-N(4)     | 129.0(3) |
| C(100)-C(97)-C(99)   | 106.5(3) |
| C(100)-C(97)-C(98)   | 107.9(3) |
| C(99)-C(97)-C(98)    | 109.7(3) |
| C(100)-C(97)-C(86)   | 112.1(3) |
| C(99)-C(97)-C(86)    | 109.6(3) |
| C(98)-C(97)-C(86)    | 110.8(3) |
| C(88)-C(101)-C(104)  | 109.1(3) |
| C(88)-C(101)-C(102)  | 110.0(4) |
| C(104)-C(101)-C(102) | 110.7(4) |
| C(88)-C(101)-C(103)  | 113.1(3) |
| C(104)-C(101)-C(103) | 107.5(4) |
| C(102)-C(101)-C(103) | 106.4(3) |
| C(106)-C(105)-C(108) | 108.1(4) |
| C(106)-C(105)-C(93)  | 111.8(3) |
| C(108)-C(105)-C(93)  | 111.8(3) |
| C(106)-C(105)-C(107) | 110.3(4) |
| C(108)-C(105)-C(107) | 107.1(4) |
| C(93)-C(105)-C(107)  | 107.6(3) |
| C(111)-C(109)-C(95)  | 112.5(3) |
| C(111)-C(109)-C(112) | 107.0(3) |
| C(95)-C(109)-C(112)  | 109.6(3) |
| C(111)-C(109)-C(110) | 106.6(3) |
| C(95)-C(109)-C(110)  | 111.0(3) |
| C(112)-C(109)-C(110) | 109.9(3) |

---

## Refinement Details and Structural data for $2 \cdot C_7H_8$

### Crystallographic Method

Crystals of  $2 \cdot C_7H_8$  were mounted on a dual-stage glass fiber using YR-1800 perfluoropolyether oil (Lancaster) and cooled rapidly to 150 K in a stream of cold nitrogen using an Oxford Cryosystems low-temperature device. Data for compound  $2 \cdot C_7H_8$  were collected on a Bruker SMART1000 diffractometer, equipped with a graphite-monochromated  $Mo-K_{\alpha}$  radiation source ( $\lambda = 0.71073 \text{ \AA}$ ). Absorption corrections were applied using a multi-scan method (SADABS).<sup>1</sup> All non-H atoms were located using direct methods<sup>2</sup> and difference Fourier syntheses. All fully occupied non-H atoms were refined with anisotropic displacement parameters. CCDC 783805 contains the supplementary data for  $2 \cdot C_7H_8$ . These data can be obtained free of charge from The Cambridge Crystallographic Data Centre via [www.ccdc.cam.ac.uk/data\\_request/cif](http://www.ccdc.cam.ac.uk/data_request/cif).

**Refinement special details:** The lattice toluene molecule was disordered over three positions. The disorder was successfully modelled using 39:33:28 occupancy levels, isotropic displacement parameters and optimised bond geometries.

Crystal data for  $2 \cdot C_7H_8$ :  $C_{56}H_{80}CdN_2 \cdot C_7H_8$ ,  $M_r = 985.75$ ,  $0.26 \times 0.16 \times 0.05 \text{ mm}^3$ , triclinic, space group  $P-1$  (No. 2),  $a = 12.192(2)$ ,  $b = 14.983(3)$ ,  $c = 16.507(3)$ ,  $\alpha = 68.19(3)$ ,  $\beta = 82.75(3)$ ,  $\gamma = 81.36(3)$ ,  $V = 2759.5(10) \text{ \AA}^3$ ,  $Z = 2$ ,  $\rho_{\text{calcd}} = 1.186 \text{ g cm}^{-3}$ ;  $\mu = 0.435 \text{ mm}^{-1}$ ,  $MoK_{\alpha}$  radiation,  $\lambda = 0.71073 \text{ \AA}$ ,  $T = 150 \text{ K}$ . 24741 reflections measured, (12387 unique,  $R_{\text{int}} = 0.040$ ,  $\theta < 27.5^\circ$ ). Data were collected on a Bruker SMART1000 diffractometer and were corrected for absorption (transmission range 0.70-0.75). The structure was solved by direct methods and refined by full-matrix least-squares on  $F^2$  to give  $wR_2 = 0.179$  for all data and  $R_1 = 0.0581$  for 7795 reflections with  $I > 2\sigma(I)$ , GooF = 1.02 for 622 parameters. Min. and max. residual electron densities  $-0.71$  and  $1.39 \text{ e/\AA}^3$ .

**Table S3.** Crystal data and structure refinement for **2•C<sub>7</sub>H<sub>8</sub>**.

|                                   |                                                   |                |
|-----------------------------------|---------------------------------------------------|----------------|
| Identification code               | CDCBTB                                            |                |
| Empirical formula                 | C <sub>63</sub> H <sub>88</sub> Cd N <sub>2</sub> |                |
| Formula weight                    | 985.75                                            |                |
| Temperature                       | 150(2) K                                          |                |
| Wavelength                        | 0.71073 Å                                         |                |
| Crystal system                    | Triclinic                                         |                |
| Space group                       | P-1                                               |                |
| Unit cell dimensions              | a = 12.192(2) Å                                   | α = 68.19(3)°. |
|                                   | b = 14.983(3) Å                                   | β = 82.75(3)°. |
|                                   | c = 16.507(3) Å                                   | γ = 81.36(3)°. |
| Volume                            | 2759.5(10) Å <sup>3</sup>                         |                |
| Z                                 | 2                                                 |                |
| Density (calculated)              | 1.186 Mg/m <sup>3</sup>                           |                |
| Absorption coefficient            | 0.435 mm <sup>-1</sup>                            |                |
| F(000)                            | 1056                                              |                |
| Crystal size                      | 0.26 x 0.16 x 0.05 mm <sup>3</sup>                |                |
| Theta range for data collection   | 1.33 to 27.50°.                                   |                |
| Index ranges                      | -15<=h<=15, -19<=k<=19, -21<=l<=21                |                |
| Reflections collected             | 24741                                             |                |
| Independent reflections           | 12387 [R(int) = 0.040]                            |                |
| Completeness to theta = 27.50°    | 97.8 %                                            |                |
| Absorption correction             | Semi-empirical from equivalents                   |                |
| Max. and min. transmission        | 0.7456 and 0.6956                                 |                |
| Refinement method                 | Full-matrix least-squares on F <sup>2</sup>       |                |
| Data / restraints / parameters    | 12387 / 22 / 622                                  |                |
| Goodness-of-fit on F <sup>2</sup> | 1.02                                              |                |
| Final R indices [I>2sigma(I)]     | R1 = 0.0581, wR2 = 0.150                          |                |
| R indices (all data)              | R1 = 0.103, wR2 = 0.179                           |                |
| Largest diff. peak and hole       | 0.71 and -1.39 e.Å <sup>-3</sup>                  |                |

**Table S4.** Bond lengths [ $\text{\AA}$ ] and angles [ $^\circ$ ] for  $2 \cdot \text{C}_7\text{H}_8$ .

---

|              |          |
|--------------|----------|
| Cd(1)-N(1)   | 2.107(4) |
| Cd(1)-C(11)  | 2.703(4) |
| Cd(1)-C(12)  | 2.710(4) |
| N(1)-C(11)   | 1.419(5) |
| N(1)-C(12)   | 1.420(5) |
| C(1)-C(2)    | 1.393(6) |
| C(1)-C(12)   | 1.418(6) |
| C(1)-C(14)   | 1.530(6) |
| Cd(2)-N(2)   | 2.117(4) |
| Cd(2)-C(39)  | 2.667(4) |
| Cd(2)-C(40)  | 2.679(4) |
| N(2)-C(40)   | 1.420(5) |
| N(2)-C(39)   | 1.424(5) |
| C(2)-C(3)    | 1.398(6) |
| C(2)-H(2)    | 0.9500   |
| C(3)-C(4)    | 1.381(6) |
| C(3)-C(17)   | 1.555(6) |
| C(4)-C(5)    | 1.389(6) |
| C(4)-H(4)    | 0.9500   |
| C(5)-C(12)   | 1.411(6) |
| C(5)-C(6)    | 1.457(6) |
| C(6)-C(7)    | 1.388(6) |
| C(6)-C(11)   | 1.407(6) |
| C(7)-C(8)    | 1.383(6) |
| C(7)-H(7)    | 0.9500   |
| C(8)-C(9)    | 1.422(6) |
| C(8)-C(21)   | 1.540(6) |
| C(9)-C(10)   | 1.383(6) |
| C(9)-H(9)    | 0.9500   |
| C(10)-C(11)  | 1.411(6) |
| C(10)-C(25)  | 1.544(6) |
| C(13)-C(14)  | 1.526(7) |
| C(13)-H(13A) | 0.9800   |
| C(13)-H(13B) | 0.9800   |
| C(13)-H(13C) | 0.9800   |
| C(14)-C(15)  | 1.523(7) |
| C(14)-C(16)  | 1.534(7) |
| C(15)-H(15A) | 0.9800   |

|              |          |
|--------------|----------|
| C(15)-H(15B) | 0.9800   |
| C(15)-H(15C) | 0.9800   |
| C(16)-H(16A) | 0.9800   |
| C(16)-H(16B) | 0.9800   |
| C(16)-H(16C) | 0.9800   |
| C(17)-C(19)  | 1.513(7) |
| C(17)-C(18)  | 1.524(7) |
| C(17)-C(20)  | 1.536(7) |
| C(18)-H(18A) | 0.9800   |
| C(18)-H(18B) | 0.9800   |
| C(18)-H(18C) | 0.9800   |
| C(19)-H(19A) | 0.9800   |
| C(19)-H(19B) | 0.9800   |
| C(19)-H(19C) | 0.9800   |
| C(20)-H(20A) | 0.9800   |
| C(20)-H(20B) | 0.9800   |
| C(20)-H(20C) | 0.9800   |
| C(21)-C(24)  | 1.531(6) |
| C(21)-C(22)  | 1.533(6) |
| C(21)-C(23)  | 1.542(6) |
| C(22)-H(22A) | 0.9800   |
| C(22)-H(22B) | 0.9800   |
| C(22)-H(22C) | 0.9800   |
| C(23)-H(23A) | 0.9800   |
| C(23)-H(23B) | 0.9800   |
| C(23)-H(23C) | 0.9800   |
| C(24)-H(24A) | 0.9800   |
| C(24)-H(24B) | 0.9800   |
| C(24)-H(24C) | 0.9800   |
| C(25)-C(27)  | 1.521(7) |
| C(25)-C(28)  | 1.527(6) |
| C(25)-C(26)  | 1.534(6) |
| C(26)-H(26A) | 0.9800   |
| C(26)-H(26B) | 0.9800   |
| C(26)-H(26C) | 0.9800   |
| C(27)-H(27A) | 0.9800   |
| C(27)-H(27B) | 0.9800   |
| C(27)-H(27C) | 0.9800   |
| C(28)-H(28A) | 0.9800   |
| C(28)-H(28B) | 0.9800   |



|              |          |
|--------------|----------|
| C(28)-H(28C) | 0.9800   |
| C(29)-C(30)  | 1.380(6) |
| C(29)-C(40)  | 1.424(5) |
| C(29)-C(41)  | 1.533(6) |
| C(30)-C(31)  | 1.423(6) |
| C(30)-H(30)  | 0.9500   |
| C(31)-C(32)  | 1.382(5) |
| C(31)-C(45)  | 1.532(6) |
| C(32)-C(33)  | 1.403(6) |
| C(32)-H(32)  | 0.9500   |
| C(33)-C(40)  | 1.392(6) |
| C(33)-C(34)  | 1.455(5) |
| C(34)-C(35)  | 1.390(6) |
| C(34)-C(39)  | 1.402(6) |
| C(35)-C(36)  | 1.386(6) |
| C(35)-H(35)  | 0.9500   |
| C(36)-C(37)  | 1.405(6) |
| C(36)-C(49)  | 1.547(6) |
| C(37)-C(38)  | 1.391(6) |
| C(37)-H(37)  | 0.9500   |
| C(38)-C(39)  | 1.416(5) |
| C(38)-C(53)  | 1.531(6) |
| C(41)-C(42)  | 1.513(6) |
| C(41)-C(43)  | 1.534(6) |
| C(41)-C(44)  | 1.539(6) |
| C(42)-H(42A) | 0.9800   |
| C(42)-H(42B) | 0.9800   |
| C(42)-H(42C) | 0.9800   |
| C(43)-H(43A) | 0.9800   |
| C(43)-H(43B) | 0.9800   |
| C(43)-H(43C) | 0.9800   |
| C(44)-H(44A) | 0.9800   |
| C(44)-H(44B) | 0.9800   |
| C(44)-H(44C) | 0.9800   |
| C(45)-C(47)  | 1.523(6) |
| C(45)-C(48)  | 1.528(6) |
| C(45)-C(46)  | 1.533(6) |
| C(46)-H(46A) | 0.9800   |
| C(46)-H(46B) | 0.9800   |
| C(46)-H(46C) | 0.9800   |

|               |           |
|---------------|-----------|
| C(47)-H(47A)  | 0.9800    |
| C(47)-H(47B)  | 0.9800    |
| C(47)-H(47C)  | 0.9800    |
| C(48)-H(48A)  | 0.9800    |
| C(48)-H(48B)  | 0.9800    |
| C(48)-H(48C)  | 0.9800    |
| C(49)-C(51)   | 1.519(7)  |
| C(49)-C(50)   | 1.523(7)  |
| C(49)-C(52)   | 1.529(7)  |
| C(50)-H(50A)  | 0.9800    |
| C(50)-H(50B)  | 0.9800    |
| C(50)-H(50C)  | 0.9800    |
| C(51)-H(51A)  | 0.9800    |
| C(51)-H(51B)  | 0.9800    |
| C(51)-H(51C)  | 0.9800    |
| C(52)-H(52A)  | 0.9800    |
| C(52)-H(52B)  | 0.9800    |
| C(52)-H(52C)  | 0.9800    |
| C(53)-C(55)   | 1.520(7)  |
| C(53)-C(54)   | 1.528(6)  |
| C(53)-C(56)   | 1.531(7)  |
| C(54)-H(54A)  | 0.9800    |
| C(54)-H(54B)  | 0.9800    |
| C(54)-H(54C)  | 0.9800    |
| C(55)-H(55A)  | 0.9800    |
| C(55)-H(55B)  | 0.9800    |
| C(55)-H(55C)  | 0.9800    |
| C(56)-H(56A)  | 0.9800    |
| C(56)-H(56B)  | 0.9800    |
| C(56)-H(56C)  | 0.9800    |
| C(100)-C(101) | 1.3900    |
| C(100)-C(105) | 1.3900    |
| C(100)-C(106) | 1.474(12) |
| C(101)-C(102) | 1.3900    |
| C(101)-H(10A) | 0.9500    |
| C(102)-C(103) | 1.3900    |
| C(102)-H(10B) | 0.9500    |
| C(103)-C(104) | 1.3900    |
| C(103)-H(10C) | 0.9500    |
| C(104)-C(105) | 1.3900    |

|                    |            |
|--------------------|------------|
| C(104)-H(10D)      | 0.9500     |
| C(105)-H(10E)      | 0.9500     |
| C(106)-H(10F)      | 0.9800     |
| C(106)-H(10G)      | 0.9800     |
| C(106)-H(10H)      | 0.9800     |
| C(110)-C(115)      | 1.28(3)    |
| C(110)-C(116)      | 1.473(16)  |
| C(110)-C(111)      | 1.48(2)    |
| C(111)-C(112)      | 1.4416     |
| C(111)-H(11A)      | 0.9500     |
| C(112)-C(113)      | 1.28(3)    |
| C(112)-H(11C)      | 0.9501     |
| C(113)-C(114)      | 1.44(4)    |
| C(113)-H(11D)      | 0.9500     |
| C(114)-C(115)      | 1.39(3)    |
| C(114)-H(11F)      | 0.9500     |
| C(115)-H(11G)      | 0.9500     |
| C(116)-H(11H)      | 0.9800     |
| C(116)-H(11I)      | 0.9800     |
| C(116)-H(11J)      | 0.9800     |
| C(200)-C(201)      | 1.3900     |
| C(200)-C(205)      | 1.3900     |
| C(200)-C(206)      | 1.469(12)  |
| C(201)-C(202)      | 1.3900     |
| C(201)-H(20D)      | 0.9500     |
| C(202)-C(203)      | 1.3900     |
| C(202)-H(20E)      | 0.9500     |
| C(203)-C(204)      | 1.3900     |
| C(203)-H(20F)      | 0.9500     |
| C(204)-C(205)      | 1.3900     |
| C(204)-H(20G)      | 0.9500     |
| C(205)-H(20H)      | 0.9500     |
| C(206)-H(20I)      | 0.9800     |
| C(206)-H(20J)      | 0.9800     |
| C(206)-H(20K)      | 0.9800     |
|                    |            |
| N(1)-Cd(1)-C(11)   | 31.30(12)  |
| N(1)#1-Cd(1)-C(11) | 148.70(12) |
| N(1)-Cd(1)-C(12)   | 31.20(12)  |
| N(1)#1-Cd(1)-C(12) | 148.80(12) |

|                     |            |
|---------------------|------------|
| C(11)-Cd(1)-C(12)   | 49.02(12)  |
| C(11)#1-Cd(1)-C(12) | 130.98(12) |
| C(11)-N(1)-C(12)    | 104.6(3)   |
| C(11)-N(1)-Cd(1)    | 98.2(2)    |
| C(12)-N(1)-Cd(1)    | 98.5(3)    |
| C(2)-C(1)-C(12)     | 114.4(4)   |
| C(2)-C(1)-C(14)     | 122.1(4)   |
| C(12)-C(1)-C(14)    | 123.3(4)   |
| N(2)-Cd(2)-C(39)    | 32.08(12)  |
| N(2)#2-Cd(2)-C(39)  | 147.92(12) |
| N(2)-Cd(2)-C(40)    | 31.79(12)  |
| N(2)#2-Cd(2)-C(40)  | 148.21(12) |
| C(39)-Cd(2)-C(40)   | 49.64(12)  |
| C(39)#2-Cd(2)-C(40) | 130.36(12) |
| C(40)-N(2)-C(39)    | 104.2(3)   |
| C(40)-N(2)-Cd(2)    | 96.5(2)    |
| C(39)-N(2)-Cd(2)    | 95.8(2)    |
| C(1)-C(2)-C(3)      | 125.0(4)   |
| C(1)-C(2)-H(2)      | 117.5      |
| C(3)-C(2)-H(2)      | 117.5      |
| C(4)-C(3)-C(2)      | 119.0(4)   |
| C(4)-C(3)-C(17)     | 121.8(4)   |
| C(2)-C(3)-C(17)     | 119.1(4)   |
| C(3)-C(4)-C(5)      | 118.7(4)   |
| C(3)-C(4)-H(4)      | 120.6      |
| C(5)-C(4)-H(4)      | 120.6      |
| C(4)-C(5)-C(12)     | 121.3(4)   |
| C(4)-C(5)-C(6)      | 132.4(4)   |
| C(12)-C(5)-C(6)     | 106.2(4)   |
| C(7)-C(6)-C(11)     | 120.7(4)   |
| C(7)-C(6)-C(5)      | 132.9(4)   |
| C(11)-C(6)-C(5)     | 106.3(4)   |
| C(8)-C(7)-C(6)      | 119.7(4)   |
| C(8)-C(7)-H(7)      | 120.2      |
| C(6)-C(7)-H(7)      | 120.2      |
| C(7)-C(8)-C(9)      | 118.2(4)   |
| C(7)-C(8)-C(21)     | 122.9(4)   |
| C(9)-C(8)-C(21)     | 118.9(4)   |
| C(10)-C(9)-C(8)     | 124.2(4)   |
| C(10)-C(9)-H(9)     | 117.9      |

|                     |          |
|---------------------|----------|
| C(8)-C(9)-H(9)      | 117.9    |
| C(9)-C(10)-C(11)    | 115.4(4) |
| C(9)-C(10)-C(25)    | 121.9(4) |
| C(11)-C(10)-C(25)   | 122.5(4) |
| C(6)-C(11)-C(10)    | 121.4(4) |
| C(6)-C(11)-N(1)     | 111.4(3) |
| C(10)-C(11)-N(1)    | 127.2(4) |
| C(6)-C(11)-Cd(1)    | 107.8(3) |
| C(10)-C(11)-Cd(1)   | 109.7(3) |
| N(1)-C(11)-Cd(1)    | 50.5(2)  |
| C(5)-C(12)-C(1)     | 121.2(4) |
| C(5)-C(12)-N(1)     | 111.3(3) |
| C(1)-C(12)-N(1)     | 127.5(4) |
| C(5)-C(12)-Cd(1)    | 107.9(3) |
| C(1)-C(12)-Cd(1)    | 109.0(3) |
| N(1)-C(12)-Cd(1)    | 50.3(2)  |
| C(14)-C(13)-H(13A)  | 109.5    |
| C(14)-C(13)-H(13B)  | 109.5    |
| H(13A)-C(13)-H(13B) | 109.5    |
| C(14)-C(13)-H(13C)  | 109.5    |
| H(13A)-C(13)-H(13C) | 109.5    |
| H(13B)-C(13)-H(13C) | 109.5    |
| C(15)-C(14)-C(13)   | 108.1(4) |
| C(15)-C(14)-C(1)    | 113.6(4) |
| C(13)-C(14)-C(1)    | 107.9(4) |
| C(15)-C(14)-C(16)   | 106.1(4) |
| C(13)-C(14)-C(16)   | 109.9(5) |
| C(1)-C(14)-C(16)    | 111.2(4) |
| C(14)-C(15)-H(15A)  | 109.5    |
| C(14)-C(15)-H(15B)  | 109.5    |
| H(15A)-C(15)-H(15B) | 109.5    |
| C(14)-C(15)-H(15C)  | 109.5    |
| H(15A)-C(15)-H(15C) | 109.5    |
| H(15B)-C(15)-H(15C) | 109.5    |
| C(14)-C(16)-H(16A)  | 109.5    |
| C(14)-C(16)-H(16B)  | 109.5    |
| H(16A)-C(16)-H(16B) | 109.5    |
| C(14)-C(16)-H(16C)  | 109.5    |
| H(16A)-C(16)-H(16C) | 109.5    |
| H(16B)-C(16)-H(16C) | 109.5    |

|                     |          |
|---------------------|----------|
| C(19)-C(17)-C(18)   | 110.0(4) |
| C(19)-C(17)-C(20)   | 109.2(5) |
| C(18)-C(17)-C(20)   | 107.6(5) |
| C(19)-C(17)-C(3)    | 108.9(4) |
| C(18)-C(17)-C(3)    | 110.2(4) |
| C(20)-C(17)-C(3)    | 110.9(4) |
| C(17)-C(18)-H(18A)  | 109.5    |
| C(17)-C(18)-H(18B)  | 109.5    |
| H(18A)-C(18)-H(18B) | 109.5    |
| C(17)-C(18)-H(18C)  | 109.5    |
| H(18A)-C(18)-H(18C) | 109.5    |
| H(18B)-C(18)-H(18C) | 109.5    |
| C(17)-C(19)-H(19A)  | 109.5    |
| C(17)-C(19)-H(19B)  | 109.5    |
| H(19A)-C(19)-H(19B) | 109.5    |
| C(17)-C(19)-H(19C)  | 109.5    |
| H(19A)-C(19)-H(19C) | 109.5    |
| H(19B)-C(19)-H(19C) | 109.5    |
| C(17)-C(20)-H(20A)  | 109.5    |
| C(17)-C(20)-H(20B)  | 109.5    |
| H(20A)-C(20)-H(20B) | 109.5    |
| C(17)-C(20)-H(20C)  | 109.5    |
| H(20A)-C(20)-H(20C) | 109.5    |
| H(20B)-C(20)-H(20C) | 109.5    |
| C(24)-C(21)-C(22)   | 108.5(4) |
| C(24)-C(21)-C(8)    | 108.7(4) |
| C(22)-C(21)-C(8)    | 111.7(4) |
| C(24)-C(21)-C(23)   | 109.4(4) |
| C(22)-C(21)-C(23)   | 107.7(4) |
| C(8)-C(21)-C(23)    | 110.9(3) |
| C(21)-C(22)-H(22A)  | 109.5    |
| C(21)-C(22)-H(22B)  | 109.5    |
| H(22A)-C(22)-H(22B) | 109.5    |
| C(21)-C(22)-H(22C)  | 109.5    |
| H(22A)-C(22)-H(22C) | 109.5    |
| H(22B)-C(22)-H(22C) | 109.5    |
| C(21)-C(23)-H(23A)  | 109.5    |
| C(21)-C(23)-H(23B)  | 109.5    |
| H(23A)-C(23)-H(23B) | 109.5    |
| C(21)-C(23)-H(23C)  | 109.5    |

|                     |          |
|---------------------|----------|
| H(23A)-C(23)-H(23C) | 109.5    |
| H(23B)-C(23)-H(23C) | 109.5    |
| C(21)-C(24)-H(24A)  | 109.5    |
| C(21)-C(24)-H(24B)  | 109.5    |
| H(24A)-C(24)-H(24B) | 109.5    |
| C(21)-C(24)-H(24C)  | 109.5    |
| H(24A)-C(24)-H(24C) | 109.5    |
| H(24B)-C(24)-H(24C) | 109.5    |
| C(27)-C(25)-C(28)   | 107.9(4) |
| C(27)-C(25)-C(26)   | 108.5(4) |
| C(28)-C(25)-C(26)   | 108.0(4) |
| C(27)-C(25)-C(10)   | 112.5(3) |
| C(28)-C(25)-C(10)   | 112.2(4) |
| C(26)-C(25)-C(10)   | 107.5(4) |
| C(25)-C(26)-H(26A)  | 109.5    |
| C(25)-C(26)-H(26B)  | 109.5    |
| H(26A)-C(26)-H(26B) | 109.5    |
| C(25)-C(26)-H(26C)  | 109.5    |
| H(26A)-C(26)-H(26C) | 109.5    |
| H(26B)-C(26)-H(26C) | 109.5    |
| C(25)-C(27)-H(27A)  | 109.5    |
| C(25)-C(27)-H(27B)  | 109.5    |
| H(27A)-C(27)-H(27B) | 109.5    |
| C(25)-C(27)-H(27C)  | 109.5    |
| H(27A)-C(27)-H(27C) | 109.5    |
| H(27B)-C(27)-H(27C) | 109.5    |
| C(25)-C(28)-H(28A)  | 109.5    |
| C(25)-C(28)-H(28B)  | 109.5    |
| H(28A)-C(28)-H(28B) | 109.5    |
| C(25)-C(28)-H(28C)  | 109.5    |
| H(28A)-C(28)-H(28C) | 109.5    |
| H(28B)-C(28)-H(28C) | 109.5    |
| C(30)-C(29)-C(40)   | 115.0(4) |
| C(30)-C(29)-C(41)   | 123.3(4) |
| C(40)-C(29)-C(41)   | 121.6(4) |
| C(29)-C(30)-C(31)   | 124.8(4) |
| C(29)-C(30)-H(30)   | 117.6    |
| C(31)-C(30)-H(30)   | 117.6    |
| C(32)-C(31)-C(30)   | 118.0(4) |
| C(32)-C(31)-C(45)   | 122.2(4) |

|                   |          |
|-------------------|----------|
| C(30)-C(31)-C(45) | 119.8(3) |
| C(31)-C(32)-C(33) | 119.3(4) |
| C(31)-C(32)-H(32) | 120.3    |
| C(33)-C(32)-H(32) | 120.3    |
| C(40)-C(33)-C(32) | 121.0(4) |
| C(40)-C(33)-C(34) | 106.7(3) |
| C(32)-C(33)-C(34) | 132.3(4) |
| C(35)-C(34)-C(39) | 120.9(4) |
| C(35)-C(34)-C(33) | 133.0(4) |
| C(39)-C(34)-C(33) | 106.1(3) |
| C(36)-C(35)-C(34) | 119.0(4) |
| C(36)-C(35)-H(35) | 120.5    |
| C(34)-C(35)-H(35) | 120.5    |
| C(35)-C(36)-C(37) | 118.9(4) |
| C(35)-C(36)-C(49) | 121.8(4) |
| C(37)-C(36)-C(49) | 119.3(4) |
| C(38)-C(37)-C(36) | 124.4(4) |
| C(38)-C(37)-H(37) | 117.8    |
| C(36)-C(37)-H(37) | 117.8    |
| C(37)-C(38)-C(39) | 114.9(4) |
| C(37)-C(38)-C(53) | 122.1(4) |
| C(39)-C(38)-C(53) | 123.0(4) |
| C(34)-C(39)-C(38) | 121.7(4) |
| C(34)-C(39)-N(2)  | 111.2(3) |
| C(38)-C(39)-N(2)  | 127.1(4) |
| C(34)-C(39)-Cd(2) | 105.3(3) |
| C(38)-C(39)-Cd(2) | 110.4(3) |
| N(2)-C(39)-Cd(2)  | 52.1(2)  |
| C(33)-C(40)-N(2)  | 111.5(3) |
| C(33)-C(40)-C(29) | 121.6(4) |
| N(2)-C(40)-C(29)  | 126.9(4) |
| C(33)-C(40)-Cd(2) | 105.2(3) |
| N(2)-C(40)-Cd(2)  | 51.7(2)  |
| C(29)-C(40)-Cd(2) | 110.9(3) |
| C(42)-C(41)-C(29) | 108.8(4) |
| C(42)-C(41)-C(43) | 109.3(4) |
| C(29)-C(41)-C(43) | 112.1(3) |
| C(42)-C(41)-C(44) | 108.1(4) |
| C(29)-C(41)-C(44) | 111.9(3) |
| C(43)-C(41)-C(44) | 106.6(4) |



|                     |          |
|---------------------|----------|
| C(41)-C(42)-H(42A)  | 109.5    |
| C(41)-C(42)-H(42B)  | 109.5    |
| H(42A)-C(42)-H(42B) | 109.5    |
| C(41)-C(42)-H(42C)  | 109.5    |
| H(42A)-C(42)-H(42C) | 109.5    |
| H(42B)-C(42)-H(42C) | 109.5    |
| C(41)-C(43)-H(43A)  | 109.5    |
| C(41)-C(43)-H(43B)  | 109.5    |
| H(43A)-C(43)-H(43B) | 109.5    |
| C(41)-C(43)-H(43C)  | 109.5    |
| H(43A)-C(43)-H(43C) | 109.5    |
| H(43B)-C(43)-H(43C) | 109.5    |
| C(41)-C(44)-H(44A)  | 109.5    |
| C(41)-C(44)-H(44B)  | 109.5    |
| H(44A)-C(44)-H(44B) | 109.5    |
| C(41)-C(44)-H(44C)  | 109.5    |
| H(44A)-C(44)-H(44C) | 109.5    |
| H(44B)-C(44)-H(44C) | 109.5    |
| C(47)-C(45)-C(48)   | 107.3(4) |
| C(47)-C(45)-C(31)   | 111.6(4) |
| C(48)-C(45)-C(31)   | 111.9(3) |
| C(47)-C(45)-C(46)   | 109.3(4) |
| C(48)-C(45)-C(46)   | 108.0(4) |
| C(31)-C(45)-C(46)   | 108.6(4) |
| C(45)-C(46)-H(46A)  | 109.5    |
| C(45)-C(46)-H(46B)  | 109.5    |
| H(46A)-C(46)-H(46B) | 109.5    |
| C(45)-C(46)-H(46C)  | 109.5    |
| H(46A)-C(46)-H(46C) | 109.5    |
| H(46B)-C(46)-H(46C) | 109.5    |
| C(45)-C(47)-H(47A)  | 109.5    |
| C(45)-C(47)-H(47B)  | 109.5    |
| H(47A)-C(47)-H(47B) | 109.5    |
| C(45)-C(47)-H(47C)  | 109.5    |
| H(47A)-C(47)-H(47C) | 109.5    |
| H(47B)-C(47)-H(47C) | 109.5    |
| C(45)-C(48)-H(48A)  | 109.5    |
| C(45)-C(48)-H(48B)  | 109.5    |
| H(48A)-C(48)-H(48B) | 109.5    |
| C(45)-C(48)-H(48C)  | 109.5    |

|                     |          |
|---------------------|----------|
| H(48A)-C(48)-H(48C) | 109.5    |
| H(48B)-C(48)-H(48C) | 109.5    |
| C(51)-C(49)-C(50)   | 108.5(4) |
| C(51)-C(49)-C(52)   | 109.9(4) |
| C(50)-C(49)-C(52)   | 107.9(4) |
| C(51)-C(49)-C(36)   | 108.2(4) |
| C(50)-C(49)-C(36)   | 111.4(3) |
| C(52)-C(49)-C(36)   | 110.9(4) |
| C(49)-C(50)-H(50A)  | 109.5    |
| C(49)-C(50)-H(50B)  | 109.5    |
| H(50A)-C(50)-H(50B) | 109.5    |
| C(49)-C(50)-H(50C)  | 109.5    |
| H(50A)-C(50)-H(50C) | 109.5    |
| H(50B)-C(50)-H(50C) | 109.5    |
| C(49)-C(51)-H(51A)  | 109.5    |
| C(49)-C(51)-H(51B)  | 109.5    |
| H(51A)-C(51)-H(51B) | 109.5    |
| C(49)-C(51)-H(51C)  | 109.5    |
| H(51A)-C(51)-H(51C) | 109.5    |
| H(51B)-C(51)-H(51C) | 109.5    |
| C(49)-C(52)-H(52A)  | 109.5    |
| C(49)-C(52)-H(52B)  | 109.5    |
| H(52A)-C(52)-H(52B) | 109.5    |
| C(49)-C(52)-H(52C)  | 109.5    |
| H(52A)-C(52)-H(52C) | 109.5    |
| H(52B)-C(52)-H(52C) | 109.5    |
| C(55)-C(53)-C(54)   | 106.9(4) |
| C(55)-C(53)-C(38)   | 112.8(4) |
| C(54)-C(53)-C(38)   | 111.9(4) |
| C(55)-C(53)-C(56)   | 107.8(4) |
| C(54)-C(53)-C(56)   | 109.1(5) |
| C(38)-C(53)-C(56)   | 108.3(4) |
| C(53)-C(54)-H(54A)  | 109.5    |
| C(53)-C(54)-H(54B)  | 109.5    |
| H(54A)-C(54)-H(54B) | 109.5    |
| C(53)-C(54)-H(54C)  | 109.5    |
| H(54A)-C(54)-H(54C) | 109.5    |
| H(54B)-C(54)-H(54C) | 109.5    |
| C(53)-C(55)-H(55A)  | 109.5    |
| C(53)-C(55)-H(55B)  | 109.5    |

|                      |           |
|----------------------|-----------|
| H(55A)-C(55)-H(55B)  | 109.5     |
| C(53)-C(55)-H(55C)   | 109.5     |
| H(55A)-C(55)-H(55C)  | 109.5     |
| H(55B)-C(55)-H(55C)  | 109.5     |
| C(53)-C(56)-H(56A)   | 109.5     |
| C(53)-C(56)-H(56B)   | 109.5     |
| H(56A)-C(56)-H(56B)  | 109.5     |
| C(53)-C(56)-H(56C)   | 109.5     |
| H(56A)-C(56)-H(56C)  | 109.5     |
| H(56B)-C(56)-H(56C)  | 109.5     |
| C(101)-C(100)-C(105) | 120.0     |
| C(101)-C(100)-C(106) | 119.7(4)  |
| C(105)-C(100)-C(106) | 120.3(4)  |
| C(102)-C(101)-C(100) | 120.0     |
| C(102)-C(101)-H(10A) | 120.0     |
| C(100)-C(101)-H(10A) | 120.0     |
| C(100)-C(101)-H(11C) | 103.3     |
| C(101)-C(102)-C(103) | 120.0     |
| C(101)-C(102)-H(10B) | 120.0     |
| C(103)-C(102)-H(10B) | 120.0     |
| C(104)-C(103)-C(102) | 120.0     |
| C(104)-C(103)-H(10C) | 120.0     |
| C(102)-C(103)-H(10C) | 120.0     |
| C(103)-C(104)-C(105) | 120.0     |
| C(103)-C(104)-H(10D) | 120.0     |
| C(105)-C(104)-H(10D) | 120.0     |
| C(104)-C(105)-C(100) | 120.0     |
| C(104)-C(105)-H(10E) | 120.0     |
| C(100)-C(105)-H(10E) | 120.0     |
| C(115)-C(110)-C(116) | 128(2)    |
| C(115)-C(110)-C(111) | 118.4(19) |
| C(116)-C(110)-C(111) | 113.8(15) |
| C(112)-C(111)-C(110) | 112.0(9)  |
| C(112)-C(111)-H(11A) | 124.0     |
| C(110)-C(111)-H(11A) | 124.0     |
| C(113)-C(112)-C(111) | 132.4(15) |
| C(113)-C(112)-H(11C) | 115.6     |
| C(111)-C(112)-H(11C) | 112.1     |
| C(112)-C(113)-C(114) | 111(2)    |
| C(112)-C(113)-H(11D) | 124.7     |

|                      |          |
|----------------------|----------|
| C(114)-C(113)-H(11D) | 124.7    |
| C(115)-C(114)-C(113) | 123(2)   |
| C(115)-C(114)-H(11F) | 118.7    |
| C(113)-C(114)-H(11F) | 118.7    |
| C(110)-C(115)-C(114) | 124(3)   |
| C(110)-C(115)-H(11G) | 118.0    |
| C(114)-C(115)-H(11G) | 118.0    |
| C(110)-C(116)-H(11H) | 109.5    |
| C(110)-C(116)-H(11I) | 109.5    |
| H(11H)-C(116)-H(11I) | 109.5    |
| C(110)-C(116)-H(11J) | 109.5    |
| H(11H)-C(116)-H(11J) | 109.5    |
| H(11I)-C(116)-H(11J) | 109.5    |
| C(201)-C(200)-C(205) | 120.0    |
| C(201)-C(200)-C(206) | 119.4(4) |
| C(205)-C(200)-C(206) | 120.5(4) |
| C(202)-C(201)-C(200) | 120.0    |
| C(202)-C(201)-H(20D) | 120.0    |
| C(200)-C(201)-H(20D) | 120.0    |
| C(201)-C(202)-C(203) | 120.0    |
| C(201)-C(202)-H(20E) | 120.0    |
| C(203)-C(202)-H(20E) | 120.0    |
| C(202)-C(203)-C(204) | 120.0    |
| C(202)-C(203)-H(20F) | 120.0    |
| C(204)-C(203)-H(20F) | 120.0    |
| C(203)-C(204)-C(205) | 120.0    |
| C(203)-C(204)-H(20G) | 120.0    |
| C(205)-C(204)-H(20G) | 120.0    |
| C(204)-C(205)-C(200) | 120.0    |
| C(204)-C(205)-H(20H) | 120.0    |
| C(200)-C(205)-H(20H) | 120.0    |

---

Symmetry transformations used to generate equivalent atoms:

#1 -x+1,-y+1,-z+1 #2 -x+2,-y,-z

## References

1. G. M. Sheldrick, *SADABS, Program for area detector absorption correction*, Institute for Inorganic Chemistry, University of Göttingen, Germany, **1996**.
2. G. M. Sheldrick, *Acta Crystallogr. Sect. A: Found. Crystallogr.* **2008**, *64*, 112.

## DFT Calculations

Restricted geometry optimisations were performed for models of **1**, **1a** and **2** using coordinates derived from the X-ray crystal structures of these compounds. **1** was geometry optimised without constraints whereas **1a** and **2** were geometry optimised in  $C_i$  symmetry (the molecular symmetry of **2** as derived from X-ray crystallography). The calculations were performed using the Amsterdam Density Functional (ADF) suite version 2009.01.<sup>1,2</sup> The DFT geometry optimisations employed all-electron Slater type orbital (STO) triple- $\zeta$ -plus polarisation basis sets (from the ZORA/TZP database of the ADF suite for the Zn, Cd, C, N, and H atoms. Scalar relativistic approaches were used within the ZORA Hamiltonian for the inclusion of relativistic effects and the local density approximation (LDA) with the correlation potential due to Vosko et al.<sup>3</sup> was used in all of the calculations. Gradient corrections were performed using the functionals of Becke<sup>4</sup> and Perdew.<sup>5</sup> The bond orders between molecular fragments were calculated using the AOMix program.<sup>6,7</sup>

## References

1. C. Fonseca Guerra, J. G. Snijders, G. te Velde and E. J. Baerends, *Theor. Chem. Acc.* 1998, **99**, 391.
2. G. te Velde, F. M. Bickelhaupt, S. J. A. van Gisbergen, C. Fonseca Guerra, E. J. Baerends, J. G. Snijders and T. Ziegler, *J. Comput. Chem.* 2001, **22**, 931.
3. S. H. Vosko, L. Wilk, M. Nusair, *Can. J. Phys.* 1980, **58**, 1200.
4. A. D. Becke, *Phys. Rev. A.* 1988, **38**, 3098.
5. J. P. Perdew, *Phys. Rev. B.* 1986, **33**, 8822.
6. S. I. Gorelsky, AOMix: Program for Molecular Orbital Analysis; University of Ottawa, 2009, <http://www.sg-chem.net/>
7. S. I. Gorelsky, A. B. P. Lever, *J. Organomet. Chem.* 2001, **635**, 187.

## Geometry Optimised Structure and Coordinates for **1**

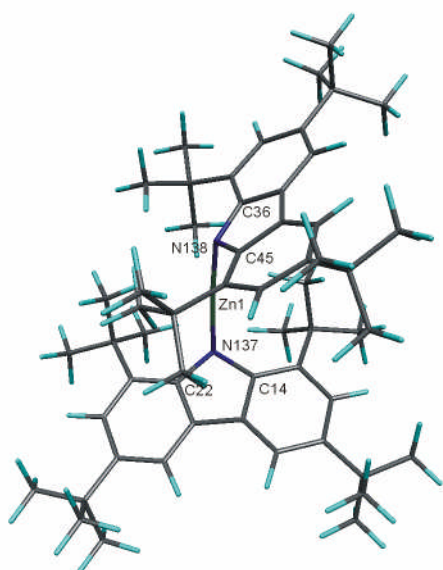

|      |           |           |           |
|------|-----------|-----------|-----------|
| 1.C  | 1.310623  | 3.981448  | -4.907242 |
| 2.C  | -1.012181 | -0.060136 | -4.711303 |
| 3.C  | 3.746344  | 3.433029  | -4.733844 |
| 4.C  | 0.143588  | -2.027801 | -3.717836 |
| 5.C  | 2.436376  | 3.599334  | -3.928783 |
| 6.C  | -0.421993 | -0.622791 | -3.401482 |
| 7.C  | 1.029103  | 1.479306  | -3.480938 |
| 8.C  | 2.134890  | 2.294389  | -3.167762 |
| 9.C  | 0.706345  | 0.270196  | -2.838888 |
| 10.C | 2.610034  | 4.757812  | -2.920161 |
| 11.C | -7.264117 | -0.535630 | -1.585467 |
| 12.C | -1.588386 | -0.748571 | -2.404864 |
| 13.C | 3.008227  | 1.845406  | -2.175531 |
| 14.C | 1.545182  | -0.086800 | -1.753237 |
| 15.C | 2.719104  | 0.665071  | -1.490862 |
| 16.C | -7.343129 | -2.904324 | -0.797231 |
| 17.C | -6.969554 | -1.467129 | -0.387826 |
| 18.C | 2.260911  | -4.282606 | -0.572969 |
| 19.C | 3.499758  | -0.086890 | -0.538960 |
| 20.C | -5.490927 | -1.340412 | 0.029546  |
| 21.C | 7.793335  | -0.501104 | 0.063010  |
| 22.C | 2.768529  | -1.265237 | -0.228660 |
| 23.C | -7.868265 | -1.052268 | 0.801062  |
| 24.C | 4.784413  | 0.139356  | -0.046320 |
| 25.C | -4.937990 | -0.086813 | 0.293713  |
| 26.C | -4.669477 | -2.467714 | 0.233514  |
| 27.C | -1.507357 | -3.994503 | -0.124482 |
| 28.C | 3.386968  | -2.296255 | 0.523655  |
| 29.C | -3.952410 | 5.288545  | 1.189472  |
| 30.C | -3.609428 | 0.007769  | 0.711942  |
| 31.C | 2.776068  | -3.695130 | 0.761121  |
| 32.C | 5.394270  | -0.824768 | 0.757956  |

|      |           |           |           |
|------|-----------|-----------|-----------|
| 33.C | -3.333961 | -2.430422 | 0.671105  |
| 34.C | 4.678012  | -2.012163 | 1.006521  |
| 35.C | -1.504365 | 5.676428  | 0.850662  |
| 36.C | -2.784206 | -1.137142 | 0.878912  |
| 37.C | -3.188412 | 2.508102  | 1.166636  |
| 38.C | 3.804732  | -4.699130 | 1.324781  |
| 39.C | -2.840871 | 1.155330  | 1.121007  |
| 40.C | 6.830760  | -0.603339 | 1.270243  |
| 41.C | -2.589972 | -3.755147 | 0.946667  |
| 42.C | -3.524945 | -4.982861 | 0.893458  |
| 43.C | -2.276604 | 3.430209  | 1.677022  |
| 44.C | -2.550315 | 4.944213  | 1.722424  |
| 45.C | -1.579170 | 0.678620  | 1.566001  |
| 46.C | 6.897731  | 0.713092  | 2.077616  |
| 47.C | 1.631676  | -3.613557 | 1.788286  |
| 48.C | 7.314875  | -1.750413 | 2.176090  |
| 49.C | -1.064767 | 2.925171  | 2.188083  |
| 50.C | -0.675876 | 1.575546  | 2.196129  |
| 51.C | 1.809512  | 2.058013  | 2.456502  |
| 52.C | -1.972226 | -3.723101 | 2.363129  |
| 53.C | 1.002336  | -0.239044 | 2.982765  |
| 54.C | -2.446935 | 5.460188  | 3.176533  |
| 55.C | 0.610243  | 1.245161  | 2.995580  |
| 56.C | 0.367173  | 1.628674  | 4.478389  |
| 57.H | 1.183175  | 3.231247  | -5.700746 |
| 58.H | -0.242057 | 0.065144  | -5.485151 |
| 59.H | 3.655545  | 2.618294  | -5.467020 |
| 60.H | 1.553453  | 4.937046  | -5.394545 |
| 61.H | -1.761405 | -0.767202 | -5.096218 |
| 62.H | 3.986650  | 4.361484  | -5.276015 |
| 63.H | 0.915622  | -1.968785 | -4.498803 |
| 64.H | -1.516995 | 0.904982  | -4.560917 |
| 65.H | 0.348432  | 4.102807  | -4.389435 |
| 66.H | -0.662777 | -2.684906 | -4.080324 |
| 67.H | 0.393931  | 1.791620  | -4.303072 |
| 68.H | 4.593604  | 3.196435  | -4.074852 |
| 69.H | 0.597331  | -2.485361 | -2.830644 |
| 70.H | -6.644309 | -0.801061 | -2.454155 |
| 71.H | 2.830013  | 5.697660  | -3.450422 |
| 72.H | -8.322404 | -0.614730 | -1.879343 |
| 73.H | -2.440829 | -1.271851 | -2.864510 |
| 74.H | -7.064997 | 0.516290  | -1.340510 |
| 75.H | 1.696823  | 4.901075  | -2.325052 |
| 76.H | -6.718236 | -3.265592 | -1.626812 |
| 77.H | 3.924343  | 2.389986  | -1.943636 |
| 78.H | -1.936296 | 0.231044  | -2.049265 |
| 79.H | 3.436840  | 4.565367  | -2.222724 |
| 80.H | -8.391473 | -2.933854 | -1.128742 |
| 81.H | -1.316035 | -1.363035 | -1.529676 |
| 82.H | 3.094231  | -4.418244 | -1.277653 |
| 83.H | 1.527865  | -3.625332 | -1.052022 |
| 84.H | 7.520271  | 0.332329  | -0.599045 |



|       |           |           |           |
|-------|-----------|-----------|-----------|
| 85.H  | -1.951397 | -4.042255 | -1.128448 |
| 86.H  | 7.770710  | -1.423978 | -0.534707 |
| 87.H  | 1.796717  | -5.265880 | -0.398444 |
| 88.H  | -8.932465 | -1.126951 | 0.525429  |
| 89.H  | -4.077650 | 4.973551  | 0.143598  |
| 90.H  | -7.245313 | -3.609338 | 0.040497  |
| 91.H  | -5.534599 | 0.821794  | 0.203041  |
| 92.H  | 5.310923  | 1.052875  | -0.325639 |
| 93.H  | -7.667675 | -0.016625 | 1.109574  |
| 94.H  | 8.827099  | -0.336572 | 0.406337  |
| 95.H  | -5.111179 | -3.444721 | 0.067712  |
| 96.H  | -1.560107 | 5.337997  | -0.194099 |
| 97.H  | -0.744362 | -3.199482 | -0.148239 |
| 98.H  | 4.678595  | -4.796300 | 0.665675  |
| 99.H  | -3.942228 | -5.149727 | -0.109722 |
| 100.H | -0.965893 | -4.933559 | 0.064069  |
| 101.H | -4.168396 | 2.818654  | 0.808581  |
| 102.H | -4.109611 | 6.376248  | 1.231032  |
| 103.H | -7.690439 | -1.700720 | 1.671425  |
| 104.H | -1.677328 | 6.764125  | 0.873584  |
| 105.H | -4.741919 | 4.813618  | 1.789764  |
| 106.H | 3.331540  | -5.689019 | 1.403706  |
| 107.H | 6.591026  | 1.574851  | 1.469214  |
| 108.H | 5.174814  | -2.785259 | 1.583595  |
| 109.H | 2.002419  | 1.827199  | 1.398917  |
| 110.H | -0.482687 | 5.487198  | 1.208119  |
| 111.H | 7.352422  | -2.709013 | 1.638946  |
| 112.H | 0.817849  | -2.950448 | 1.458368  |
| 113.H | -2.951063 | -5.881880 | 1.162684  |
| 114.H | -4.356543 | -4.889748 | 1.605443  |
| 115.H | 4.155048  | -4.423945 | 2.329653  |
| 116.H | 1.181934  | -4.604646 | 1.950789  |
| 117.H | 7.925502  | 0.897049  | 2.427890  |
| 118.H | 1.392517  | -0.549545 | 1.996167  |
| 119.H | 8.331761  | -1.534633 | 2.535341  |
| 120.H | -0.380501 | 3.637086  | 2.649222  |
| 121.H | 6.236716  | 0.670339  | 2.955517  |
| 122.H | 1.643164  | 3.139990  | 2.541383  |
| 123.H | 1.991427  | -3.231208 | 2.753554  |
| 124.H | -1.320709 | -2.854405 | 2.506756  |
| 125.H | 6.668300  | -1.873967 | 3.056738  |
| 126.H | 2.716663  | 1.812401  | 3.029679  |
| 127.H | -1.391234 | -4.639808 | 2.547654  |
| 128.H | -2.646467 | 6.542625  | 3.213526  |
| 129.H | 0.171944  | -0.893226 | 3.270431  |
| 130.H | -3.174472 | 4.952350  | 3.826269  |
| 131.H | -2.768865 | -3.665409 | 3.119060  |
| 132.H | 1.837988  | -0.404117 | 3.679142  |
| 133.H | -1.446229 | 5.291664  | 3.597254  |
| 134.H | 0.124268  | 2.693730  | 4.587412  |
| 135.H | -0.465721 | 1.049399  | 4.902877  |
| 136.H | 1.271471  | 1.422175  | 5.072676  |

|        |           |           |           |
|--------|-----------|-----------|-----------|
| 137.N  | 1.499242  | -1.237573 | -0.892078 |
| 138.N  | -1.497586 | -0.740165 | 1.348205  |
| 139.Zn | -0.003324 | -1.083093 | 0.248706  |

**Energy = -804.91905621 eV**

Geometry Optimised Structure and Coordinates for **1a**

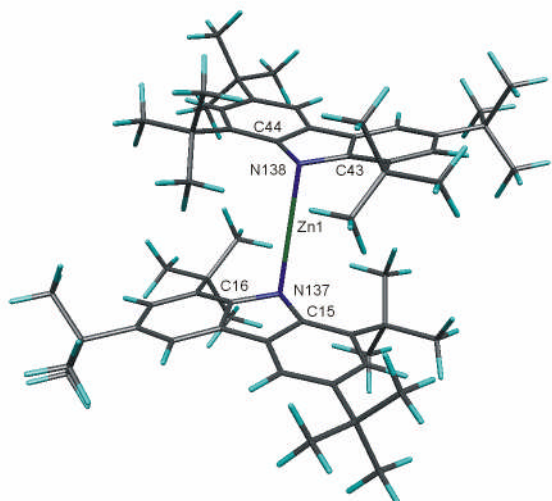

|      |           |           |           |
|------|-----------|-----------|-----------|
| 1.C  | 1.651383  | 2.282887  | -3.691237 |
| 2.C  | 1.416210  | -2.390172 | -3.727485 |
| 3.C  | 1.255663  | 4.426256  | -2.461182 |
| 4.C  | 0.792035  | -4.493861 | -2.524959 |
| 5.C  | 1.228435  | 2.890187  | -2.330435 |
| 6.C  | 0.926364  | -2.965425 | -2.375130 |
| 7.C  | -6.050806 | 3.870204  | -1.369467 |
| 8.C  | -0.480420 | -2.405166 | -2.086959 |
| 9.C  | -0.229564 | 2.479891  | -2.045485 |
| 10.C | -4.630519 | -4.939941 | -1.340686 |
| 11.C | -6.426059 | -3.202413 | -1.412216 |
| 12.C | -4.081522 | 5.406966  | -1.280155 |
| 13.C | 2.221843  | 2.379945  | -1.262616 |
| 14.C | 1.964528  | -2.577416 | -1.298997 |
| 15.C | 2.321065  | 1.020746  | -0.873888 |
| 16.C | 2.203177  | -1.241737 | -0.890134 |
| 17.C | -5.339005 | -3.833997 | -0.524208 |
| 18.C | -4.904183 | 4.374452  | -0.475060 |
| 19.C | 3.220001  | 3.219941  | -0.752632 |
| 20.C | 2.867472  | -3.524373 | -0.799019 |
| 21.C | 5.523684  | -5.076650 | -0.756703 |
| 22.C | 6.029213  | 4.478927  | -0.701064 |
| 23.C | 3.450394  | 0.547114  | -0.158928 |
| 24.C | 3.372977  | -0.898731 | -0.166527 |
| 25.C | -4.250532 | 1.886577  | -0.301427 |
| 26.C | -4.428908 | -1.430762 | -0.317247 |
| 27.C | -3.988320 | 3.225414  | -0.011852 |

|      |           |           |           |
|------|-----------|-----------|-----------|
| 28.C | -4.306335 | -2.793895 | -0.048852 |
| 29.C | 4.306335  | 2.793895  | 0.048852  |
| 30.C | 3.988320  | -3.225414 | 0.011852  |
| 31.C | -6.029213 | -4.478927 | 0.701064  |
| 32.C | -5.523684 | 5.076650  | 0.756703  |
| 33.C | 4.428908  | 1.430762  | 0.317247  |
| 34.C | 4.250532  | -1.886577 | 0.301427  |
| 35.C | -3.372977 | 0.898731  | 0.166527  |
| 36.C | -3.450394 | -0.547114 | 0.158928  |
| 37.C | 4.904183  | -4.374452 | 0.475060  |
| 38.C | 5.339005  | 3.833997  | 0.524208  |
| 39.C | -2.867472 | 3.524373  | 0.799019  |
| 40.C | -3.220001 | -3.219941 | 0.752632  |
| 41.C | 4.081522  | -5.406966 | 1.280155  |
| 42.C | 6.426059  | 3.202413  | 1.412216  |
| 43.C | -2.203177 | 1.241737  | 0.890134  |
| 44.C | -2.321065 | -1.020746 | 0.873888  |
| 45.C | -1.964528 | 2.577416  | 1.298997  |
| 46.C | -2.221843 | -2.379945 | 1.262616  |
| 47.C | 6.050806  | -3.870204 | 1.369467  |
| 48.C | 4.630519  | 4.939941  | 1.340686  |
| 49.C | 0.229564  | -2.479891 | 2.045485  |
| 50.C | 0.480420  | 2.405166  | 2.086959  |
| 51.C | -0.792035 | 4.493861  | 2.524959  |
| 52.C | -0.926364 | 2.965425  | 2.375130  |
| 53.C | -1.255663 | -4.426256 | 2.461182  |
| 54.C | -1.228435 | -2.890187 | 2.330435  |
| 55.C | -1.416210 | 2.390172  | 3.727485  |
| 56.C | -1.651383 | -2.282887 | 3.691237  |
| 57.H | 0.964380  | 2.618148  | -4.484772 |
| 58.H | 0.700426  | -2.640722 | -4.526831 |
| 59.H | 2.670967  | 2.594290  | -3.960799 |
| 60.H | 2.397867  | -2.804998 | -3.998596 |
| 61.H | 1.506816  | -1.297163 | -3.674455 |
| 62.H | 1.625139  | 1.185855  | -3.651702 |
| 63.H | 0.514130  | 4.736621  | -3.211451 |
| 64.H | 0.023841  | -4.714687 | -3.279946 |
| 65.H | 2.234167  | 4.796205  | -2.797372 |
| 66.H | 1.726792  | -4.960898 | -2.864740 |
| 67.H | -1.189560 | -2.767085 | -2.846760 |
| 68.H | -0.896900 | 2.925351  | -2.798698 |
| 69.H | -5.670679 | 3.361224  | -2.266895 |
| 70.H | -6.665309 | 4.719917  | -1.700737 |
| 71.H | -4.143419 | -4.519158 | -2.232279 |
| 72.H | -5.358487 | -5.697754 | -1.670312 |
| 73.H | -5.993997 | -2.726764 | -2.304271 |
| 74.H | -0.490002 | -1.308628 | -2.147587 |
| 75.H | -0.356964 | 1.391599  | -2.120354 |
| 76.H | -7.126579 | -3.979100 | -1.752235 |
| 77.H | -3.641936 | 4.946111  | -2.176604 |
| 78.H | -4.724470 | 6.241532  | -1.601035 |
| 79.H | -6.710094 | 3.174065  | -0.831524 |

|       |           |           |           |
|-------|-----------|-----------|-----------|
| 80.H  | 1.001785  | 4.923744  | -1.513690 |
| 81.H  | -3.859963 | -5.450549 | -0.746914 |
| 82.H  | 0.484969  | -4.973354 | -1.584032 |
| 83.H  | 4.750015  | -5.500518 | -1.411740 |
| 84.H  | 6.545943  | 3.719205  | -1.305398 |
| 85.H  | -0.863096 | -2.726548 | -1.107118 |
| 86.H  | -0.574133 | 2.826849  | -1.060367 |
| 87.H  | 2.718962  | -4.564057 | -1.082878 |
| 88.H  | 3.180388  | 4.273245  | -1.021975 |
| 89.H  | 6.118428  | -4.369708 | -1.353303 |
| 90.H  | 5.303760  | 4.988017  | -1.350575 |
| 91.H  | -7.008832 | -2.446805 | -0.866257 |
| 92.H  | -5.138114 | 1.594660  | -0.860625 |
| 93.H  | -5.283736 | -1.039522 | -0.866665 |
| 94.H  | -3.261015 | 5.825640  | -0.681346 |
| 95.H  | -6.770892 | -5.225140 | 0.374885  |
| 96.H  | 6.182373  | -5.899776 | -0.437589 |
| 97.H  | -6.182373 | 5.899776  | 0.437589  |
| 98.H  | 6.770892  | 5.225140  | -0.374885 |
| 99.H  | 3.261015  | -5.825640 | 0.681346  |
| 100.H | 7.008832  | 2.446805  | 0.866257  |
| 101.H | -6.118428 | 4.369708  | 1.353303  |
| 102.H | -5.303760 | -4.988017 | 1.350575  |
| 103.H | -6.545943 | -3.719205 | 1.305398  |
| 104.H | 5.283736  | 1.039522  | 0.866665  |
| 105.H | 5.138114  | -1.594660 | 0.860625  |
| 106.H | -4.750015 | 5.500518  | 1.411740  |
| 107.H | -3.180388 | -4.273245 | 1.021975  |
| 108.H | -2.718962 | 4.564057  | 1.082878  |
| 109.H | 6.710094  | -3.174065 | 0.831524  |
| 110.H | 7.126579  | 3.979100  | 1.752235  |
| 111.H | 4.724470  | -6.241532 | 1.601035  |
| 112.H | 3.859963  | 5.450549  | 0.746914  |
| 113.H | 0.574133  | -2.826849 | 1.060367  |
| 114.H | 0.863096  | 2.726548  | 1.107118  |
| 115.H | -0.484969 | 4.973354  | 1.584032  |
| 116.H | -1.001785 | -4.923744 | 1.513690  |
| 117.H | 3.641936  | -4.946111 | 2.176604  |
| 118.H | 5.993997  | 2.726764  | 2.304271  |
| 119.H | 5.358487  | 5.697754  | 1.670312  |
| 120.H | 6.665309  | -4.719917 | 1.700737  |
| 121.H | 5.670679  | -3.361224 | 2.266895  |
| 122.H | 0.356964  | -1.391599 | 2.120354  |
| 123.H | 0.490002  | 1.308628  | 2.147587  |
| 124.H | 4.143419  | 4.519158  | 2.232279  |
| 125.H | -1.726792 | 4.960898  | 2.864740  |
| 126.H | -2.234167 | -4.796205 | 2.797372  |
| 127.H | 0.896900  | -2.925351 | 2.798698  |
| 128.H | 1.189560  | 2.767085  | 2.846760  |
| 129.H | -0.023841 | 4.714687  | 3.279946  |
| 130.H | -0.514130 | -4.736621 | 3.211451  |
| 131.H | -1.625139 | -1.185855 | 3.651702  |

|        |           |           |           |
|--------|-----------|-----------|-----------|
| 132.H  | -1.506816 | 1.297163  | 3.674455  |
| 133.H  | -2.397867 | 2.804998  | 3.998596  |
| 134.H  | -2.670967 | -2.594290 | 3.960799  |
| 135.H  | -0.700426 | 2.640722  | 4.526831  |
| 136.H  | -0.964380 | -2.618148 | 4.484772  |
| 137.N  | 1.460054  | -0.066133 | -1.231113 |
| 138.N  | -1.460054 | 0.066133  | 1.231113  |
| 139.Zn | 0.000000  | 0.000000  | 0.000000  |

**Energy = -804.87863635 eV**

Geometry Optimised Structure and Coordinates for **2**

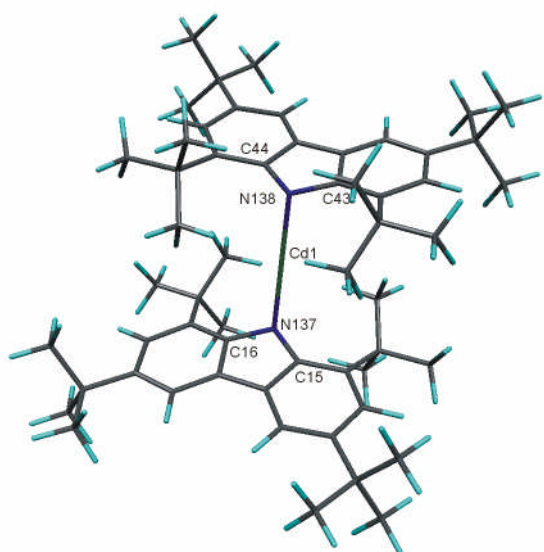

|      |           |           |           |
|------|-----------|-----------|-----------|
| 1.C  | 1.717644  | 2.341265  | -3.769292 |
| 2.C  | 1.469814  | -2.436998 | -3.803892 |
| 3.C  | 1.347786  | 4.455697  | -2.481880 |
| 4.C  | 0.895875  | -4.532097 | -2.562225 |
| 5.C  | 1.324393  | 2.917114  | -2.386448 |
| 6.C  | 1.021623  | -3.001037 | -2.432902 |
| 7.C  | -6.118440 | 3.868701  | -1.365445 |
| 8.C  | -0.384498 | -2.451183 | -2.115706 |
| 9.C  | -0.129030 | 2.499760  | -2.080951 |
| 10.C | -4.678921 | -4.902170 | -1.360189 |
| 11.C | -6.505083 | -3.194629 | -1.384981 |
| 12.C | -4.121306 | 5.371727  | -1.306909 |
| 13.C | 2.336586  | 2.384155  | -1.347718 |
| 14.C | 2.079517  | -2.591780 | -1.383725 |
| 15.C | 2.458624  | 1.011880  | -1.007910 |
| 16.C | 2.341404  | -1.244524 | -1.023357 |
| 17.C | -5.411744 | -3.836706 | -0.512050 |
| 18.C | -4.971280 | 4.382029  | -0.476530 |
| 19.C | 3.313785  | 3.225430  | -0.801489 |

|      |           |           |           |
|------|-----------|-----------|-----------|
| 20.C | 2.960949  | -3.537521 | -0.845394 |
| 21.C | 5.590333  | -5.137759 | -0.723313 |
| 22.C | 6.097319  | 4.534952  | -0.686480 |
| 23.C | 3.581450  | 0.541034  | -0.278610 |
| 24.C | 3.505274  | -0.902938 | -0.286845 |
| 25.C | -4.362654 | 1.890557  | -0.217631 |
| 26.C | -4.539705 | -1.426965 | -0.233099 |
| 27.C | -4.081876 | 3.232607  | 0.035085  |
| 28.C | -4.401250 | -2.794034 | 0.003270  |
| 29.C | 4.401250  | 2.794034  | -0.003270 |
| 30.C | 4.081876  | -3.232607 | -0.035085 |
| 31.C | -6.097319 | -4.534952 | 0.686480  |
| 32.C | -5.590333 | 5.137759  | 0.723313  |
| 33.C | 4.539705  | 1.426965  | 0.233099  |
| 34.C | 4.362654  | -1.890557 | 0.217631  |
| 35.C | -3.505274 | 0.902938  | 0.286845  |
| 36.C | -3.581450 | -0.541034 | 0.278610  |
| 37.C | 4.971280  | -4.382029 | 0.476530  |
| 38.C | 5.411744  | 3.836706  | 0.512050  |
| 39.C | -2.960949 | 3.537521  | 0.845394  |
| 40.C | -3.313785 | -3.225430 | 0.801489  |
| 41.C | 4.121306  | -5.371727 | 1.306909  |
| 42.C | 6.505083  | 3.194629  | 1.384981  |
| 43.C | -2.341404 | 1.244524  | 1.023357  |
| 44.C | -2.458624 | -1.011880 | 1.007910  |
| 45.C | -2.079517 | 2.591780  | 1.383725  |
| 46.C | -2.336586 | -2.384155 | 1.347718  |
| 47.C | 6.118440  | -3.868701 | 1.365445  |
| 48.C | 4.678921  | 4.902170  | 1.360189  |
| 49.C | 0.129030  | -2.499760 | 2.080951  |
| 50.C | 0.384498  | 2.451183  | 2.115706  |
| 51.C | -0.895875 | 4.532097  | 2.562225  |
| 52.C | -1.021623 | 3.001037  | 2.432902  |
| 53.C | -1.347786 | -4.455697 | 2.481880  |
| 54.C | -1.324393 | -2.917114 | 2.386448  |
| 55.C | -1.469814 | 2.436998  | 3.803892  |
| 56.C | -1.717644 | -2.341265 | 3.769292  |
| 57.H | 1.012576  | 2.690584  | -4.540702 |
| 58.H | 0.734277  | -2.699446 | -4.581249 |
| 59.H | 2.729663  | 2.663653  | -4.053765 |
| 60.H | 2.445501  | -2.850806 | -4.096850 |
| 61.H | 1.557584  | -1.343415 | -3.762922 |
| 62.H | 1.697956  | 1.243664  | -3.751402 |
| 63.H | 0.600446  | 4.782490  | -3.219242 |
| 64.H | 0.123658  | -4.768385 | -3.308472 |
| 65.H | 2.323837  | 4.833756  | -2.815946 |
| 66.H | 1.832282  | -4.995572 | -2.902218 |
| 67.H | -1.114806 | -2.847334 | -2.837103 |
| 68.H | -0.815947 | 2.979764  | -2.794009 |
| 69.H | -5.738887 | 3.323868  | -2.241714 |
| 70.H | -6.714784 | 4.717576  | -1.730661 |
| 71.H | -4.193635 | -4.443021 | -2.233734 |

|       |           |           |           |
|-------|-----------|-----------|-----------|
| 72.H  | -5.391321 | -5.660985 | -1.720307 |
| 73.H  | -6.077049 | -2.683901 | -2.259462 |
| 74.H  | -0.410683 | -1.357420 | -2.216390 |
| 75.H  | -0.260585 | 1.415971  | -2.203972 |
| 76.H  | -7.191426 | -3.971279 | -1.752842 |
| 77.H  | -3.679504 | 4.872345  | -2.181454 |
| 78.H  | -4.745476 | 6.205755  | -1.664414 |
| 79.H  | -6.795069 | 3.202282  | -0.811695 |
| 80.H  | 1.100949  | 4.930932  | -1.521182 |
| 81.H  | -3.903360 | -5.419284 | -0.778628 |
| 82.H  | 0.599504  | -5.002382 | -1.613121 |
| 83.H  | 4.814951  | -5.566840 | -1.372923 |
| 84.H  | 6.631633  | 3.805361  | -1.312219 |
| 85.H  | -0.731730 | -2.746090 | -1.113207 |
| 86.H  | -0.448308 | 2.807095  | -1.072801 |
| 87.H  | 2.793948  | -4.583647 | -1.092514 |
| 88.H  | 3.255287  | 4.286718  | -1.033315 |
| 89.H  | 6.206580  | -4.463713 | -1.335857 |
| 90.H  | 5.366376  | 5.051848  | -1.323587 |
| 91.H  | -7.102214 | -2.465968 | -0.818341 |
| 92.H  | -5.245447 | 1.596247  | -0.783080 |
| 93.H  | -5.388910 | -1.034730 | -0.790620 |
| 94.H  | -3.300600 | 5.797284  | -0.713238 |
| 95.H  | -6.823129 | -5.283482 | 0.330934  |
| 96.H  | 6.227771  | -5.963395 | -0.369069 |
| 97.H  | -6.227771 | 5.963395  | 0.369069  |
| 98.H  | 6.823129  | 5.283482  | -0.330934 |
| 99.H  | 3.300600  | -5.797284 | 0.713238  |
| 100.H | 7.102214  | 2.465968  | 0.818341  |
| 101.H | -6.206580 | 4.463713  | 1.335857  |
| 102.H | -5.366376 | -5.051848 | 1.323587  |
| 103.H | -6.631633 | -3.805361 | 1.312219  |
| 104.H | 5.388910  | 1.034730  | 0.790620  |
| 105.H | 5.245447  | -1.596247 | 0.783080  |
| 106.H | -4.814951 | 5.566840  | 1.372923  |
| 107.H | -3.255287 | -4.286718 | 1.033315  |
| 108.H | -2.793948 | 4.583647  | 1.092514  |
| 109.H | 6.795069  | -3.202282 | 0.811695  |
| 110.H | 7.191426  | 3.971279  | 1.752842  |
| 111.H | 4.745476  | -6.205755 | 1.664414  |
| 112.H | 3.903360  | 5.419284  | 0.778628  |
| 113.H | 0.448308  | -2.807095 | 1.072801  |
| 114.H | 0.731730  | 2.746090  | 1.113207  |
| 115.H | -0.599504 | 5.002382  | 1.613121  |
| 116.H | -1.100949 | -4.930932 | 1.521182  |
| 117.H | 3.679504  | -4.872345 | 2.181454  |
| 118.H | 6.077049  | 2.683901  | 2.259462  |
| 119.H | 5.391321  | 5.660985  | 1.720307  |
| 120.H | 6.714784  | -4.717576 | 1.730661  |
| 121.H | 5.738887  | -3.323868 | 2.241714  |
| 122.H | 0.260585  | -1.415971 | 2.203972  |
| 123.H | 0.410683  | 1.357420  | 2.216390  |

|        |           |           |           |
|--------|-----------|-----------|-----------|
| 124.H  | 4.193635  | 4.443021  | 2.233734  |
| 125.H  | -1.832282 | 4.995572  | 2.902218  |
| 126.H  | -2.323837 | -4.833756 | 2.815946  |
| 127.H  | 0.815947  | -2.979764 | 2.794009  |
| 128.H  | 1.114806  | 2.847334  | 2.837103  |
| 129.H  | -0.123658 | 4.768385  | 3.308472  |
| 130.H  | -0.600446 | -4.782490 | 3.219242  |
| 131.H  | -1.697956 | -1.243664 | 3.751402  |
| 132.H  | -1.557584 | 1.343415  | 3.762922  |
| 133.H  | -2.445501 | 2.850806  | 4.096850  |
| 134.H  | -2.729663 | -2.663653 | 4.053765  |
| 135.H  | -0.734277 | 2.699446  | 4.581249  |
| 136.H  | -1.012576 | -2.690584 | 4.540702  |
| 137.N  | 1.619428  | -0.073070 | -1.404016 |
| 138.N  | -1.619428 | 0.073070  | 1.404016  |
| 139.Cd | 0.000000  | 0.000000  | 0.000000  |

**Energy = -804.16338982 eV**
